# Supplementary material for: Return of genetic and genomic research findings: experience of a pediatric biorepository
Source: BMC Med Genomics. 2019 Nov 27;12:173. doi: 10.1186/s12920-019-0618-0 (PMC6882371; doi:10.1186/s12920-019-0618-0)
Supplement: Supplementary file 6 — Additional file 6: Table S1. Research findings deemed not reportable by the Return of Results Committee. [file 12920_2019_618_MOESM6_ESM.xlsx]

## Sheet: Suppl Table 1
Supplementary Table 1: Research findings deemed not reportable by the Return of Results Committee
Type of research test	Gene: DNA change	Variant type	Cardiac diagnosis	Related to primary cardiac diagnosis	Reason for non-return
Genome sequencing	MYH7: c.G5395A	Missense	DCM	Y	Lack of strong evidence for pathogenicity
Genome sequencing	TNNT2:c.G506A	Missense	DCM	Y	Lack of strong evidence for pathogenicity
Genome sequencing	TTN:c.86076dupA	Frameshift	DCM	Y	Lack of strong evidence for pathogenicity
Genome sequencing	CALR3:c.G218A	Missense	HCM	Y	Lack of strong evidence for pathogenicity
Genome sequencing	RYR2:c.C7160T	Missense	ARVD	Y	Lack of strong evidence for pathogenicity
Genome sequencing	SCN5A:c.G5738A	Missense	ARVD	Y	Lack of strong evidence for pathogenicity
Genome sequencing	MYBPC3:c.G1246A	Missense	DCM	Y	Lack of strong evidence for pathogenicity
Genome sequencing	FLNC: c.C3557T	Missense	RCM	Y	Lack of strong evidence for pathogenicity
Genome sequencing	TMEM70: c.C238T	Stopgain	HCM	Y	Associated with a recessive disorder
Genome sequencing	MYBPC3:c.G1828A	Missense	HCM	Y	Lack of strong evidence for pathogenicity
Genome sequencing	SCN2B:c.G83A	Missense	HCM	N	Secondary variant unrelated to childhood disease
Genome sequencing	WISP3: c.G287A	Missense	DCM	N	Secondary variant unrelated to childhood disease
Genome sequencing	SCN2B:c.G83A	Missense	HCM	N	Secondary variant unrelated to childhood disease
Genome sequencing	SCN2B:c.G83A	Missense	HCM	N	Secondary variant unrelated to childhood disease
Genome sequencing	SCN2B:c.G83A	Missense	HCM	N	Secondary variant unrelated to childhood disease
Genome sequencing	LDLR:c.C2128T	Missense	DCM	N	Secondary variant unrelated to childhood disease
Genome sequencing	FLNA:c.C1910T	Missense	HCM	N	Secondary variant unrelated to childhood disease
Genome sequencing	NR2F2: c.A110T	Missense	AVSD	Y	Lack of strong evidence for pathogenicity
Genome sequencing	NR2F2:c.G354C	Missense	AVSD	Y	Lack of strong evidence for pathogenicity
Genome sequencing	NR2F2: c.G835T	Missense	AVSD	Y	Lack of strong evidence for pathogenicity
Genome sequencing	ACTN2_chr1:236873001-237183000	Duplication	DCM	Y	Lack of strong evidence for pathogenicity
Genome sequencing	NEXN_chr1:78344107-78397098	Deletion	DCM	Y	Lack of strong evidence for pathogenicity
Genome sequencing	JPH2_chr20:42810702-42822155	Deletion	DCM	Y	Lack of strong evidence for pathogenicity
Genome sequencing	CTNNA3_chr10:68252937-68353939	Deletion	DCM	Y	Lack of strong evidence for pathogenicity
Genome sequencing	LAMA:c.C3238T	Stopgain	TOF	N	Lack of strong evidence for pathogenicity
Genome sequencing	MYBPC3: c.C2908T	Missense	TOF	N	Lack of strong evidence for pathogenicity
Genome sequencing	FBN1:c.A7949G	Missense	TOF	Y	Lack of strong evidence for pathogenicity
Genome sequencing	FBN1: c.A7949G	Missense	TOF	Y	Lack of strong evidence for pathogenicity
Genome sequencing	KCNH2:c.C3278T	Missense	TOF	N	Lack of strong evidence for pathogenicity
Genome sequencing	CITED2: c.C418T	Missense	TOF	Y	Lack of strong evidence for pathogenicity
Genome sequencing	CITED2: c.C418T	Missense	TOF	Y	Lack of strong evidence for pathogenicity
Genome sequencing	GDF1:c.C681A	Stopgain	TOF	Y	Associated with a recessive disorder
Genome sequencing	GDF1: c.C681A	Stopgain	TOF	Y	Associated with a recessive disorder
Genome sequencing	GDF1:c.C681A	Stopgain	TOF	Y	Associated with a recessive disorder
Genome sequencing	GDF1: c.C681A	Stopgain	TOF	Y	Associated with a recessive disorder
Genome sequencing	GDF1: c.C681A	Stopgain	TOF	Y	Associated with a recessive disorder
Genome sequencing	(hg19)chr19:55667647delC	Frameshift	TOF	Y	Lack of strong evidence for pathogenicity
Genome sequencing	FBN1:c.A6601G	Missense	TOF	Y	Lack of strong evidence for pathogenicity
Genome sequencing	SOS1: c.A2105G	Missense	TOF	Y	Lack of strong evidence for pathogenicity
ARVD, Arrhythmogenic Right Ventricular Dysplasia; AVSD, Atrio-ventricular septal defect; DCM, Dilated cardiomyopathy; HCM, Hypertrophic cardiomyopathy; LVNC, Left ventricular non-compaction; TOF, Tetralogy of Fallot
