# Supplementary material for: Return of genetic and genomic research findings: experience of a pediatric biorepository
Source: BMC Med Genomics. 2019 Nov 27;12:173. doi: 10.1186/s12920-019-0618-0 (PMC6882371; doi:10.1186/s12920-019-0618-0)
Supplement: Supplementary file 7 — Additional file 7: Table S2. Returnable variant details. [file 12920_2019_618_MOESM7_ESM.xlsx]

## Sheet: Suppl Table 2
Supplementary Table 2: Returnable variant details
Chromosome	Start	End	Reference allele	Alternate allele	refSeq Gene	refSeq Variant Type	refSeq Exonic Variant Effect	Ensembl Gene ID	Left-normalized dbSNP 147 ID	Ensembl Amino Acid Change	refSeq Amino Acid Change	ClinVar Pathogenicity	InterVar Classification and Evidence	gnomAD Genome AF	Exome Sequencing Project AF	1000 Genomes (2015 August) AF	Raw CADD Score	Phred-scaled CADD Score	SIFT Score	GERP++ RS Score	InterPro Protein Domain	UCSC knownGene Amino Acid Change	MetaSVM Score	Population-specific gnomAD Genome AF	OMIM Gene ID	OMIM Phenotype IDs	OrphaNet Gene-associated Disease IDs	OrphaNet Gene-associated Disease Info	ACMG Pathogenicity criteria	Final classification
1	156104249	156104249	G	A	LMNA	exonic	nonsynonymous SNV	ENSG00000160789	rs267607571	ENSG00000160789:ENST00000347559:exon3:c.G569A:p.R190Q,ENSG00000160789:ENST00000361308:exon3:c.G569A:p.R190Q,ENSG00000160789:ENST00000368299:exon3:c.G569A:p.R190Q,ENSG00000160789:ENST00000368300:exon3:c.G569A:p.R190Q,ENSG00000160789:ENST00000392353:exon3:c.G326A:p.R109Q,ENSG00000160789:ENST00000448611:exon3:c.G233A:p.R78Q,ENSG00000160789:ENST00000504687:exon3:c.G320A:p.R107Q,ENSG00000160789:ENST00…	LMNA:NM_001257374:exon3:c.G233A:p.R78Q,LMNA:NM_001282626:exon3:c.G569A:p.R190Q,LMNA:NM_005572:exon3:c.G569A:p.R190Q,LMNA:NM_170707:exon3:c.G569A:p.R190Q,LMNA:NM_170708:exon3:c.G569A:p.R190Q,LMNA:NM_001282624:exon4:c.G326A:p.R109Q,LMNA:NM_001282625:exon6:c.G569A:p.R190Q	conflicting	InterVar: Likely pathogenic PVS1=0 PS=[0, 0, 1, 0, 0] PM=[0, 1, 0, 0, 0, 0, 0] PP=[0, 0, 1, 0, 1, 0] BA1=0 BS=[0, 0, 0, 0, 0] BP=[0, 0, 0, 0, 0, 0, 0, 0]	.	.	.	7.585	34	0.002	5.44	.	LMNA:uc001fng.2:exon3:c.G569A:p.R190Q,LMNA:uc001fnh.3:exon3:c.G569A:p.R190Q,LMNA:uc001fni.3:exon3:c.G569A:p.R190Q,LMNA:uc009wro.2:exon3:c.G569A:p.R190Q,LMNA:uc010pgz.2:exon3:c.G233A:p.R78Q,LMNA:uc001fnj.3:exon4:c.G326A:p.R109Q,LMNA:uc001fnk.3:exon4:c.G272A:p.R91Q,LMNA:uc001fnf.1:exon6:c.G569A:p.R190Q	0.88	AFR:.,AMR:.,EAS:.,FIN:.,NFE:.,OTH:.,ASJ:.	150330	115200;151660;159001;176670;181350;212112;248370;275210;605588;610140;613205;616516;	261;98855;157973;168796;98856;1662;2457;90153;2229;261;98853;740;264;2348;300751;	261|Emery-Dreifuss muscular dystrophy|1-9 / 1 000 000|Autosomal dominant<br>or&nbsp;Autosomal recessive<br>or&nbsp;X-linked recessive|Childhood|181350 300696 310300 612998 612999 614302 616516~98855|Autosomal recessive Emery-Dreifuss muscular dystrophy|-|Autosomal recessive|-|616516~157973|Congenital muscular dystrophy due to LMNA mutation|<1 / 1 000 000|Not applicable|Infancy<br>Neonatal|613205~…	PS3,PM2,PP3,PP5	Likely pathogenic
3	12645700	12645700	A	G	RAF1	exonic	nonsynonymous SNV	ENSG00000132155	rs727505017	ENSG00000132155:ENST00000534997:exon3:c.T124C:p.S42P,ENSG00000132155:ENST00000432427:exon4:c.T406C:p.S136P,ENSG00000132155:ENST00000542177:exon6:c.T526C:p.S176P,ENSG00000132155:ENST00000251849:exon7:c.T769C:p.S257P,ENSG00000132155:ENST00000442415:exon7:c.T769C:p.S257P	RAF1:NM_002880:exon7:c.T769C:p.S257P	Likely pathogenic	InterVar: Likely pathogenic PVS1=0 PS=[0, 0, 1, 0, 0] PM=[0, 1, 0, 0, 0, 0, 0] PP=[0, 0, 1, 0, 1, 0] BA1=0 BS=[0, 0, 0, 0, 0] BP=[0, 0, 0, 0, 0, 0, 0, 0]	.	.	.	6.305	29.2	0.001	5.73	.	RAF1:uc011aut.2:exon3:c.T124C:p.S42P,RAF1:uc011auu.2:exon6:c.T523C:p.S175P,RAF1:uc003bxf.4:exon7:c.T769C:p.S257P	0.402	AFR:.,AMR:.,EAS:.,FIN:.,NFE:.,OTH:.,ASJ:.	164760	611553;611554;615916;	154;500;648;	154|Familial isolated dilated cardiomyopathy|1-5 / 10 000|Autosomal dominant<br>or&nbsp;Autosomal recessive<br>or&nbsp;X-linked recessive<br>or&nbsp;Mitochondrial inheritance|All ages|302045 600884 601154 601493 601494 604145 604288 604765 605582 606685 607482 608569 609909 609915 611407 611615 611878 611879 611880 612158 612877 613122 613172 613252 613286 613424 613426 613642 613694 613697 61374…	PS3,PM2,PP3,PP5	Likely pathogenic
6	7577219	7577219	C	T	DSP	exonic	stopgain	ENSG00000096696	rs730880082	ENSG00000096696:ENST00000379802:exon20:c.C2821T:p.R941X,ENSG00000096696:ENST00000418664:exon20:c.C2821T:p.R941X	DSP:NM_001008844:exon20:c.C2821T:p.R941X,DSP:NM_001319034:exon20:c.C2821T:p.R941X,DSP:NM_004415:exon20:c.C2821T:p.R941X	Pathogenic/Likely pathogenic	InterVar: Pathogenic PVS1=1 PS=[0, 0, 1, 0, 0] PM=[0, 1, 0, 0, 0, 0, 0] PP=[0, 0, 1, 0, 1, 0] BA1=0 BS=[0, 0, 0, 0, 0] BP=[0, 0, 0, 0, 0, 0, 0, 0]	.	.	.	13.997	44	.	5.77	.	DSP:uc003mxp.1:exon20:c.C2821T:p.R941X,DSP:uc003mxq.1:exon20:c.C2821T:p.R941X,DSP:uc021yle.1:exon20:c.C2821T:p.R941X	.	AFR:.,AMR:.,EAS:.,FIN:.,NFE:.,OTH:.,ASJ:.	125647	605676;607450;607655;609638;612908;615821;	65282;50942;158687;293165;217656;65282;	65282|Carvajal syndrome|<1 / 1 000 000|Autosomal recessive|Neonatal<br>Infancy<br>Childhood|605676 615821~50942|Striate palmoplantar keratoderma|-|Autosomal dominant|-|148700 607654 612908~158687|Lethal acantholytic epidermolysis bullosa|<1 / 1 000 000|Autosomal recessive|Neonatal|609638~293165|Skin fragility-woolly hair-palmoplantar keratoderma syndrome|<1 / 1 000 000|Autosomal dominant<br>or&nb…	PVS1,PS3,PM2,PP3,PP5	Pathogenic
7	128486043	128486043	G	C	FLNC	splicing	.	ENSG00000128591	rs781135153	.	.	Likely pathogenic	InterVar: Pathogenic PVS1=1 PS=[0, 0, 1, 0, 0] PM=[0, 1, 0, 0, 0, 0, 0] PP=[0, 0, 1, 0, 1, 0] BA1=0 BS=[0, 0, 0, 0, 0] BP=[0, 0, 0, 0, 0, 0, 0, 0]	.	.	.	4.998	25.1	.	5.07	.	.	.	AFR:.,AMR:.,EAS:.,FIN:.,NFE:.,OTH:.,ASJ:.	102565	609524;614065;617047;	75249;63273;171445;	75249|Familial isolated restrictive cardiomyopathy|1-9 / 100 000|Autosomal dominant<br>or&nbsp;Not applicable|All ages|115210 609578 612422 615248 617047~63273|Distal myopathy with posterior leg and anterior hand involvement|<1 / 1 000 000|Autosomal dominant|Adolescent<br>Adult|614065~171445|Muscle filaminopathy|-|Autosomal dominant|-|609524~	PVS1,PS3,PM2,PP3,PP5	Pathogenic
10	75834532	75834532	-	A	VCL	exonic	frameshift insertion	ENSG00000035403	.	ENSG00000035403:ENST00000211998:exon6:c.654dupA:p.S218fs,ENSG00000035403:ENST00000372755:exon6:c.654dupA:p.S218fs	VCL:NM_003373:exon6:c.654dupA:p.S218fs,VCL:NM_014000:exon6:c.654dupA:p.S218fs	Unknown	InterVar: Pathogenic PVS1=1 PS=[0, 0, 1, 0, 0] PM=[0, 1, 0, 0, 0, 0, 0] PP=[0, 0, 0, 0, 0, 0] BA1=0 BS=[0, 0, 0, 0, 0] BP=[0, 0, 0, 0, 0, 0, 0, 0]	.	.	.	.	.	.	.	.	VCL:uc010qky.1:exon5:c.375dupA:p.S125fs,VCL:uc001jwd.3:exon6:c.654dupA:p.S218fs,VCL:uc001jwe.3:exon6:c.654dupA:p.S218fs	.	AFR:.,AMR:.,EAS:.,FIN:.,NFE:.,OTH:.,ASJ:.	193065	611407;613255;	154;	154|Familial isolated dilated cardiomyopathy|1-5 / 10 000|Autosomal dominant<br>or&nbsp;Autosomal recessive<br>or&nbsp;X-linked recessive<br>or&nbsp;Mitochondrial inheritance|All ages|302045 600884 601154 601493 601494 604145 604288 604765 605582 606685 607482 608569 609909 609915 611407 611615 611878 611879 611880 612158 612877 613122 613172 613252 613286 613424 613426 613642 613694 613697 61374…	PVS1,PS3,PM2	Pathogenic
11	47354127	47354127	C	T	MYBPC3	exonic	nonsynonymous SNV	ENSG00000134571	.	ENSG00000134571:ENST00000256993:exon30:c.G3614A:p.G1205D,ENSG00000134571:ENST00000399249:exon31:c.G3617A:p.G1206D,ENSG00000134571:ENST00000545968:exon32:c.G3617A:p.G1206D	MYBPC3:NM_000256:exon31:c.G3617A:p.G1206D	Pathogenic	InterVar: Pathogenic PVS1=0 PS=[0, 0, 1, 0, 0] PM=[1, 1, 0, 0, 0, 0, 0] PP=[0, 0, 1, 0, 1, 0] BA1=0 BS=[0, 0, 0, 0, 0] BP=[0, 0, 0, 0, 0, 0, 0, 0]	.	.	.	7.205	34	0.001	5.34	Immunoglobulin I-set|Immunoglobulin subtype 2|Immunoglobulin-like domain|Immunoglobulin-like fold;Immunoglobulin I-set|Immunoglobulin subtype|Immunoglobulin subtype 2|Immunoglobulin-like domain|Immunoglobulin-like fold	MYBPC3:uc021qir.1:exon30:c.G2573A:p.G858D,MYBPC3:uc021qis.1:exon32:c.G3617A:p.G1206D	0.881	AFR:.,AMR:.,EAS:.,FIN:.,NFE:.,OTH:.,ASJ:.	600958	115197;615396;	154;54260;	154|Familial isolated dilated cardiomyopathy|1-5 / 10 000|Autosomal dominant<br>or&nbsp;Autosomal recessive<br>or&nbsp;X-linked recessive<br>or&nbsp;Mitochondrial inheritance|All ages|302045 600884 601154 601493 601494 604145 604288 604765 605582 606685 607482 608569 609909 609915 611407 611615 611878 611879 611880 612158 612877 613122 613172 613252 613286 613424 613426 613642 613694 613697 61374…	PS3,PM1,PM2,PP3,PP5	Pathogenic
11	47371628	47371628	C	T	MYBPC3	exonic	nonsynonymous SNV	ENSG00000134571	rs397516050	ENSG00000134571:ENST00000256993:exon4:c.G442A:p.G148R,ENSG00000134571:ENST00000399249:exon4:c.G442A:p.G148R,ENSG00000134571:ENST00000544791:exon4:c.G442A:p.G148R,ENSG00000134571:ENST00000545968:exon4:c.G442A:p.G148R	MYBPC3:NM_000256:exon4:c.G442A:p.G148R	conflicting	InterVar: Likely pathogenic PVS1=0 PS=[0, 0, 1, 0, 0] PM=[0, 1, 0, 0, 0, 0, 0] PP=[0, 0, 0, 0, 1, 0] BA1=0 BS=[0, 0, 0, 0, 0] BP=[0, 0, 0, 1, 0, 0, 0, 0]	6.46e-05	.	.	0.522	7.597	0.248	1.2	.	MYBPC3:uc021qis.1:exon4:c.G442A:p.G148R	-1.016	AFR:0,AMR:0,EAS:0,FIN:0,NFE:0.0001,OTH:0,ASJ:0	600958	115197;615396;	154;54260;	154|Familial isolated dilated cardiomyopathy|1-5 / 10 000|Autosomal dominant<br>or&nbsp;Autosomal recessive<br>or&nbsp;X-linked recessive<br>or&nbsp;Mitochondrial inheritance|All ages|302045 600884 601154 601493 601494 604145 604288 604765 605582 606685 607482 608569 609909 609915 611407 611615 611878 611879 611880 612158 612877 613122 613172 613252 613286 613424 613426 613642 613694 613697 61374…	PS3,PM2,PP5,BP4	Likely pathogenic
12	33031479	33031479	T	A	PKP2	splicing	.	ENSG00000057294	rs786204389	.	.	Likely pathogenic	InterVar: Pathogenic PVS1=1 PS=[0, 0, 1, 0, 0] PM=[0, 1, 0, 0, 0, 0, 0] PP=[0, 0, 1, 0, 1, 0] BA1=0 BS=[0, 0, 0, 0, 0] BP=[0, 0, 0, 0, 0, 0, 0, 0]	.	.	.	3.428	23	.	4.87	.	.	.	AFR:.,AMR:.,EAS:.,FIN:.,NFE:.,OTH:.,ASJ:.	602861	609040;	217656;	217656|Familial isolated arrhythmogenic right ventricular dysplasia|Unknown|Autosomal dominant|-|107970 600996 602086 602087 604400 604401 607450 609040 610193 610476 611528 615616~	PVS1,PS3,PM2,PP3,PP5	Pathogenic
14	23894525	23894525	C	T	MYH7	exonic	nonsynonymous SNV	ENSG00000092054	rs3218716	ENSG00000092054:ENST00000355349:exon21:c.G2389A:p.A797T	MYH7:NM_000257:exon21:c.G2389A:p.A797T	Likely pathogenic	InterVar: Pathogenic PVS1=0 PS=[0, 0, 1, 0, 0] PM=[1, 1, 0, 0, 0, 0, 0] PP=[0, 1, 0, 0, 1, 0] BA1=0 BS=[0, 0, 0, 0, 0] BP=[0, 0, 0, 1, 0, 0, 0, 0]	.	7.7e-05	.	2.647	20.5	0.031	0.747	IQ motif, EF-hand binding site|Myosin-like IQ motif-containing domain|P-loop containing nucleoside triphosphate hydrolase	MYH7:uc001wjx.3:exon21:c.G2389A:p.A797T	-0.162	AFR:.,AMR:.,EAS:.,FIN:.,NFE:.,OTH:.,ASJ:.	160760	160500;181430;192600;255160;608358;613426;	154;54260;53698;53698;437572;59135;	154|Familial isolated dilated cardiomyopathy|1-5 / 10 000|Autosomal dominant<br>or&nbsp;Autosomal recessive<br>or&nbsp;X-linked recessive<br>or&nbsp;Mitochondrial inheritance|All ages|302045 600884 601154 601493 601494 604145 604288 604765 605582 606685 607482 608569 609909 609915 611407 611615 611878 611879 611880 612158 612877 613122 613172 613252 613286 613424 613426 613642 613694 613697 61374…	PS3,PM1,PM2,PP2,PP5,BP4	Pathogenic
15	63354462	63354462	G	A	TPM1	exonic	nonsynonymous SNV	ENSG00000140416	rs199476317	ENSG00000140416:ENST00000317516:exon6:c.G580A:p.D194N,ENSG00000140416:ENST00000334895:exon6:c.G580A:p.D194N,ENSG00000140416:ENST00000404484:exon6:c.G580A:p.D194N,ENSG00000140416:ENST00000559281:exon6:c.G580A:p.D194N,ENSG00000140416:ENST00000560615:exon6:c.G310A:p.D104N,ENSG00000140416:ENST00000560959:exon6:c.G580A:p.D194N,ENSG00000140416:ENST00000267996:exon7:c.G688A:p.D230N,ENSG00000140416:ENST0…	TPM1:NM_001018008:exon6:c.G580A:p.D194N,TPM1:NM_001301289:exon6:c.G580A:p.D194N,TPM1:NM_001330344:exon6:c.G580A:p.D194N,TPM1:NM_001330346:exon6:c.G580A:p.D194N,TPM1:NM_001330351:exon6:c.G580A:p.D194N,TPM1:NM_000366:exon7:c.G688A:p.D230N,TPM1:NM_001018004:exon7:c.G688A:p.D230N,TPM1:NM_001018005:exon7:c.G688A:p.D230N,TPM1:NM_001018006:exon7:c.G688A:p.D230N,TPM1:NM_001018007:exon7:c.G688A:p.D230N,TP…	Pathogenic	InterVar: Likely pathogenic PVS1=0 PS=[0, 0, 1, 0, 0] PM=[0, 1, 0, 0, 0, 0, 0] PP=[0, 0, 1, 0, 1, 0] BA1=0 BS=[0, 0, 0, 0, 0] BP=[0, 0, 0, 0, 0, 0, 0, 0]	.	.	.	5.806	27.1	0.001	5.84	.	TPM1:uc002alr.3:exon6:c.G580A:p.D194N,TPM1:uc002als.3:exon6:c.G580A:p.D194N,TPM1:uc002alt.3:exon6:c.G580A:p.D194N,TPM1:uc010uif.2:exon6:c.G580A:p.D194N,TPM1:uc010uig.2:exon6:c.G580A:p.D194N,TPM1:uc002alg.3:exon7:c.G688A:p.D230N,TPM1:uc002alh.3:exon7:c.G688A:p.D230N,TPM1:uc002ali.3:exon7:c.G688A:p.D230N,TPM1:uc002alj.3:exon7:c.G688A:p.D230N,TPM1:uc002alk.3:exon7:c.G688A:p.D230N,TPM1:uc002all.3:exo…	0.176	AFR:.,AMR:.,EAS:.,FIN:.,NFE:.,OTH:.,ASJ:.	191010	115196;611878;	154;54260;	154|Familial isolated dilated cardiomyopathy|1-5 / 10 000|Autosomal dominant<br>or&nbsp;Autosomal recessive<br>or&nbsp;X-linked recessive<br>or&nbsp;Mitochondrial inheritance|All ages|302045 600884 601154 601493 601494 604145 604288 604765 605582 606685 607482 608569 609909 609915 611407 611615 611878 611879 611880 612158 612877 613122 613172 613252 613286 613424 613426 613642 613694 613697 61374…	PS3,PM2,PP3,PP5	Likely pathogenic
15	96877476	96877476	A	T	NR2F2	exonic	nonsynonymous SNV	ENSG00000185551	.	ENSG00000185551:ENST00000394166:exon2:c.A614T:p.N205I,ENSG00000185551:ENST00000394171:exon2:c.A155T:p.N52I,ENSG00000185551:ENST00000421109:exon2:c.A215T:p.N72I,ENSG00000185551:ENST00000453270:exon2:c.A155T:p.N52I,ENSG00000185551:ENST00000559679:exon2:c.A155T:p.N52I	NR2F2:NM_001145155:exon2:c.A215T:p.N72I,NR2F2:NM_001145156:exon2:c.A155T:p.N52I,NR2F2:NM_001145157:exon2:c.A155T:p.N52I,NR2F2:NM_021005:exon2:c.A614T:p.N205I	Pathogenic	InterVar: Pathogenic PVS1=0 PS=[0, 0, 1, 0, 0] PM=[1, 1, 0, 0, 0, 0, 0] PP=[0, 0, 1, 0, 1, 0] BA1=0 BS=[0, 0, 0, 0, 0] BP=[0, 0, 0, 0, 0, 0, 0, 0]	.	.	.	5.833	27.2	0.028	5.05	Nuclear hormone receptor, ligand-binding domain	NR2F2:uc002btp.3:exon2:c.A215T:p.N72I,NR2F2:uc010uri.2:exon2:c.A614T:p.N205I,NR2F2:uc010urj.2:exon2:c.A155T:p.N52I,NR2F2:uc010urk.2:exon2:c.A155T:p.N52I	0.905	AFR:.,AMR:.,EAS:.,FIN:.,NFE:.,OTH:.,ASJ:.	107773	615779;	98722;	98722|Atrioventricular canal defect|-|-|-|600309 606215 606217 614430 614474 615779~	PS3,PM1,PM2,PP3,PP5	Pathogenic
20	10639296	10639296	G	A	JAG1	exonic	stopgain	ENSG00000101384	.	ENSG00000101384:ENST00000423891:exon2:c.C37T:p.Q13X,ENSG00000101384:ENST00000254958:exon4:c.C514T:p.Q172X	JAG1:NM_000214:exon4:c.C514T:p.Q172X	Unknown	InterVar: Pathogenic PVS1=1 PS=[0, 0, 1, 0, 0] PM=[0, 1, 0, 0, 0, 0, 0] PP=[0, 0, 1, 0, 0, 0] BA1=0 BS=[0, 0, 0, 0, 0] BP=[0, 0, 0, 0, 0, 0, 0, 0]	.	.	.	11.358	37	.	5.36	Delta/Serrate/lag-2 (DSL) protein	JAG1:uc002wnw.2:exon4:c.C514T:p.Q172X	.	AFR:.,AMR:.,EAS:.,FIN:.,NFE:.,OTH:.,ASJ:.	601920	118450;187500;	3303;261600;261619;52;	3303|Tetralogy of Fallot|1-5 / 10 000|Autosomal dominant<br>or&nbsp;Multigenic/multifactorial|Neonatal<br>Antenatal|187500~261600|Alagille syndrome due to 20p12 microdeletion|Unknown|-|-|118450~261619|Alagille syndrome due to a JAG1 point mutation|-|-|-|118450~52|Alagille syndrome|Unknown|Autosomal dominant|All ages|118450 610205~	PVS1,PS3,PM2,PP3	Pathogenic
Abbrevations:
AF, allele frequency
CADD, Combined Annotation Dependent Depletion
SIFT, Sorting Intolerant From Tolerant
GERP, Genomic Evolutionary Rate Profiling
UCSC, University of California, Santa Cruz
MetaSVM, Meta-analytic Support Vector Machine
OMIM, Online Mendelian Inheritance in Man
ACMG, American College of Medical Genetics
PVS, Pathogenic criterion Very Strong
PS, Pathogenic criterion Strong
PM, Pathogenic criterion, Moderate
PP, Pathogenic criterion, Supporting
